# Supplementary material
Source: PubMed Central journal article supplement (PMC2782243)
Supplement: ddp372_1.pdf [file ddp372_1.pdf]

Supplementary Table 1: *BRCA1* carriers: rs1328615  
(8q24), time dependent Hazard ratio estimates

| Age   | Per allele HR | 95% CI    |
|-------|---------------|-----------|
| <30   | 1.06          | 0.92-1.23 |
| 30-39 | 1.03          | 0.96-1.11 |
| 40-49 | 0.98          | 0.90-1.06 |
| 50-59 | 0.94          | 0.82-1.07 |
| 60-69 | 0.68          | 0.52-0.90 |
| ≥70   | 1.13          | 0.65-1.98 |

Supplementary Table 2: Genotype frequencies by disease status and hazard ratio estimates after excluding prevalent cases

| <b>Mutation/Gene</b>  | <b>Genotype</b> | <b>Unaffected (%)</b> | <b>Affected(%)</b> | <b>HR</b> | <b>95% CI</b> | <b>p-Value</b> |
|-----------------------|-----------------|-----------------------|--------------------|-----------|---------------|----------------|
| <i>LSP1</i> rs3817198 |                 |                       |                    |           |               |                |
| <i>BRCA1</i>          | TT              | 1763 (45.8)           | 1016 (44.1)        | 1.00      |               |                |
|                       | TC              | 1673 (43.4)           | 1028 (44.6)        | 1.03      | 0.93-1.15     |                |
|                       | CC              | 414 (10.8)            | 261 (11.3)         | 1.08      | 0.92-1.27     |                |
|                       | 2df test        |                       |                    |           |               | 0.63           |
|                       | Per Allele      |                       |                    | 1.04      | 0.96-1.11     | 0.33           |
| <i>BRCA2</i>          | TT              | 1036 (45.2)           | 654 (42.5)         | 1.00      |               |                |
|                       | TC              | 1002 (43.8)           | 686 (44.6)         | 1.11      | 0.97-1.26     |                |
|                       | CC              | 251 (11.0)            | 198 (12.9)         | 1.43      | 1.15-1.76     |                |
|                       | 2df test        |                       |                    |           |               | 0.004          |
|                       | Per Allele      |                       |                    | 1.17      | 1.06-1.29     | 0.0015         |
| 2q35 rs13387042       |                 |                       |                    |           |               |                |
| <i>BRCA1</i>          | GG              | 955 (24.5)            | 479 (20.9)         | 1.00      |               |                |
|                       | GA              | 1846 (47.3)           | 1158 (50.6)        | 1.18      | 1.05-1.34     |                |
|                       | AA              | 1101 (28.2)           | 653 (28.5)         | 1.10      | 0.96-1.27     |                |
|                       | 2df test        |                       |                    |           |               | 0.026          |
|                       | Per Allele      |                       |                    | 1.04      | 0.97-1.11     | 0.23           |
|                       | Dominant        |                       |                    | 1.15      | 1.03-1.30     | 0.017          |
| <i>BRCA2</i>          | GG              | 570 (24.9)            | 318 (20.7)         | 1.00      |               |                |
|                       | GA              | 1095 (47.9)           | 773 (50.4)         | 1.23      | 1.05-1.44     |                |
|                       | AA              | 623 (27.2)            | 442 (28.8)         | 1.20      | 1.00-1.43     |                |
|                       | 2df test        |                       |                    |           |               | 0.038          |
|                       | Per Allele      |                       |                    | 1.09      | 0.99-1.19     | 0.071          |
| Dominant              |                 |                       | 1.22               | 1.04-1.42 | 0.012         |                |
| 8q24 rs13281615       |                 |                       |                    |           |               |                |
| <i>BRCA1</i>          | AA              | 1235 (31.8)           | 744 (32.3)         | 1.00      |               |                |
|                       | AG              | 1965 (50.6)           | 1144 (49.6)        | 0.97      | 0.87-1.08     |                |
|                       | GG              | 684 (17.6)            | 417 (18.1)         | 1.00      | 0.86-1.15     |                |
|                       | 2df test        |                       |                    |           |               | 0.83           |
|                       | Per-Allele      |                       |                    | 0.99      | 0.93-1.07     | 0.86           |
| <i>BRCA2</i>          | AA              | 773 (33.8)            | 476 (31.2)         | 1.00      |               |                |
|                       | AG              | 1126 (49.2)           | 778 (50.9)         | 1.02      | 0.88-1.18     |                |
|                       | GG              | 388 (17.0)            | 273 (17.9)         | 1.07      | 0.89-1.29     |                |
|                       | 2df test        |                       |                    |           |               | 0.75           |
|                       | Per-Allele      |                       |                    | 1.03      | 0.94-1.13     | 0.47           |
